# Supplementary material
Source: PubMed Central journal article supplement (PMC1458663)
Supplement: pnas_0508609103_1.pdf [file pnas_0508609103_1.pdf]

Hv female

|    |    |    |
|----|----|----|
| 1  | 11 | 21 |
| 2  | 12 | 22 |
| 3  | 13 | 23 |
| 4  | 14 | 24 |
| 5  | 15 | 25 |
| 6  | 16 | 26 |
| 7  | 17 | 27 |
| 8  | 18 | 28 |
| 9  | 19 | 29 |
| 10 | 20 | 30 |
|    | 31 |    |

X

Hs male

|    |    |    |
|----|----|----|
| 1  | 11 | 21 |
| 2  | 12 | 22 |
| 3  | 13 | 23 |
| 4  | 14 | 24 |
| 5  | 15 | 25 |
| 6  | 16 | 26 |
| 7  | 17 | 27 |
| 8  | 18 | 28 |
| 9  | 19 | 29 |
| 10 | 20 | 30 |
|    | 31 |    |

A.

F<sub>1</sub> female

|    |    |    |
|----|----|----|
| 1  | 11 | 21 |
| 2  | 12 | 22 |
| 3  | 13 | 23 |
| 4  | 14 | 24 |
| 5  | 15 | 25 |
| 6  | 16 | 26 |
| 7  | 17 | 27 |
| 8  | 18 | 28 |
| 9  | 19 | 29 |
| 10 | 20 | 30 |
|    | 31 |    |

X

Hs male

|    |    |    |
|----|----|----|
| 1  | 11 | 21 |
| 2  | 12 | 22 |
| 3  | 13 | 23 |
| 4  | 14 | 24 |
| 5  | 15 | 25 |
| 6  | 16 | 26 |
| 7  | 17 | 27 |
| 8  | 18 | 28 |
| 9  | 19 | 29 |
| 10 | 20 | 30 |
|    | 31 |    |

B.

BC<sub>1</sub> female

|    |    |    |
|----|----|----|
| 1  | 11 | 21 |
| 2  | 12 | 22 |
| 3  | 13 | 23 |
| 4  | 14 | 24 |
| 5  | 15 | 25 |
| 6  | 16 | 26 |
| 7  | 17 | 27 |
| 8  | 18 | 28 |
| 9  | 19 | 29 |
| 10 | 20 | 30 |
|    | 31 |    |

X

Hs male

|    |    |    |
|----|----|----|
| 1  | 11 | 21 |
| 2  | 12 | 22 |
| 3  | 13 | 23 |
| 4  | 14 | 24 |
| 5  | 15 | 25 |
| 6  | 16 | 26 |
| 7  | 17 | 27 |
| 8  | 18 | 28 |
| 9  | 19 | 29 |
| 10 | 20 | 30 |
|    | 31 |    |

C.

D.

BC females

*low-OAc* QTL

|    |    |    |
|----|----|----|
| 1  | 11 | 21 |
| 2  | 12 | 22 |
| 3  | 13 | 23 |
| 4  | 14 | 24 |
| 5  | 15 | 25 |
| 6  | 16 | 26 |
| 7  | 17 | 27 |
| 8  | 18 | 28 |
| 9  | 19 | 29 |
| 10 | 20 | 30 |
|    | 31 | *  |

*norm-OAc* QTL

|    |    |    |
|----|----|----|
| 1  | 11 | 21 |
| 2  | 12 | 22 |
| 3  | 13 | 23 |
| 4  | 14 | 24 |
| 5  | 15 | 25 |
| 6  | 16 | 26 |
| 7  | 17 | 27 |
| 8  | 18 | 28 |
| 9  | 19 | 29 |
| 10 | 20 | 30 |
|    | 31 | *  |

E.
