# Supplementary material
Source: PubMed Central journal article supplement (PMC1458663)
Supplement: pnas_0508609103_3.pdf [file pnas_0508609103_3.pdf]

**23.4%\* of *low-OAC* Hs females attract Hv males**

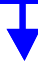

**Chance of mating:**

In cage experiments Hv males mate with

- a) Hv females: 58.3%
- b) *low-OAc* Hs females: 43.8%

Deduction: Hv males mate with *low-OAc* Hs females once they are encountered

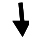

**Time before females resume calling after mating**

48 hours (ref. 69)

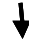

**Number of lifetime matings**

on average 2.6 times (ref. 70)

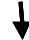

**Number of eggs oviposited**

50% after 1st mating, 83% after 2nd mating (ref. 39)

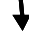

**Sperm competition**

Sperm precedence of the oldest male to mate (ref. 74)

Conspecific versus heterospecific sperm precedence unknown. Three scenario's:

- 1) always conspecific sperm precedence
- 2) always first male sperm precedence, irrespective of con/heterospecific male
- 3) always last male sperm precedence, irrespective of con/heterospecific male

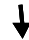

**Reproductive success of hybrid offspring**

F<sub>1</sub> males are sterile (ref. 38)

Only 30% of F<sub>1</sub> offspring are females, which enter protracted diapause of up to 2 years (refs. 38, 39)

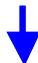

**Communication interference by Hv males  
decreases fitness of *low-OAc* Hs females by:**

- 1) 0.136** when there is always conspecific sperm precedence
- 2) 0.231** when there is always first male sperm precedence
- 3) 0.230** when there is always last male sperm precedence
