# Supplementary material
Source: PubMed Central journal article supplement (PMC1458663)

Acetate content (% of total gland content)

**A.**

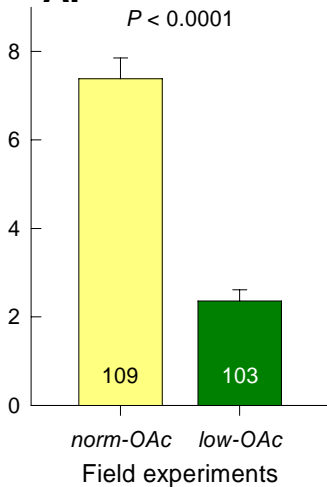

**B.**

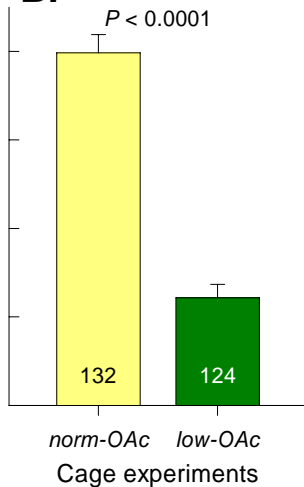

Genotype of backcross females

Supplement: pnas_0508609103_2.pdf [file pnas_0508609103_2.pdf]
